# Supplementary material for: Association between work-related biomechanical risk factors and the occurrence of carpal tunnel syndrome: an overview of systematic reviews and a meta-analysis of current research
Source: Springer Nature journal article supplement (doi:10.1186/s12891-015-0685-0), 2015-08-31
Supplement: 12891_2015_685_MOESM2_ESM.pdf [file 12891_2015_685_MOESM2_ESM.pdf]

**Additional file 2 – Search terms and strategy used for MEDLINE, EMBASE, CINAHL databases**

**Table 1 – Literature search in MEDLINE via PUBMED (Update 27.7.14)**

| #   | Search terms                                                                                                                                                                                                                                                                                               | hits     |
|-----|------------------------------------------------------------------------------------------------------------------------------------------------------------------------------------------------------------------------------------------------------------------------------------------------------------|----------|
| #1  | (occupation* OR worker*)                                                                                                                                                                                                                                                                                   | 362555   |
| #2  | ((((occupational diseases [MH] OR occupational exposure [MH] OR occupational medicine [MH] OR occupational risk* [TW] OR occupational hazard [TW] OR (industry [MeSH Terms] mortality [SH]) OR occupational group* [TW] OR work-related OR occupational air pollutants [MH] OR working environment [TW]))) | 173850   |
| #3  | #1 OR #2                                                                                                                                                                                                                                                                                                   | 386822   |
| #4  | (((((exposure [TW]) OR physical load [TW]) OR risk factor* [TW]) OR repetiti* [TW]) OR hand-arm vibration* [TW]) OR force [TW])                                                                                                                                                                            | 1517375  |
| #5  | #3 OR #4                                                                                                                                                                                                                                                                                                   | 1788402  |
| #6  | (((((("carpal tunnel syndrome" [MH] OR "carpal tunnel syndrome" [All Fields])) OR ("median nerve neuropathy" [TW] OR "median nerve entrapment [TW]")) OR "nerve compression syndrome" [TW]))                                                                                                               | 8382     |
| #7  | #5 AND #6                                                                                                                                                                                                                                                                                                  | 1655     |
| #8  | ((("meta-analysis as topic"[MH] OR meta-analysis[pt] OR meta-analysis[tiab] OR review[pt] OR review[tiab] NOT (letter[pt] OR editorial[pt] OR comment[pt] NOT ("animals"[MeSH Terms:noexp] NOT "humans"[MeSH Terms])))                                                                                     | 2214544  |
| #9  | #7 AND #8                                                                                                                                                                                                                                                                                                  | 335      |
| #10 | ("1998/01/01"[PDAT] : "3000"[PDAT])                                                                                                                                                                                                                                                                        | 11159129 |
| #11 | #9 AND #10                                                                                                                                                                                                                                                                                                 | 226      |
| #12 | Filters: Abstracts                                                                                                                                                                                                                                                                                         | 222      |

1  
2

**Table 2 - Literature search in EMBASE via OVID (Update 27.7.14)**

| # | Search terms                 | hits   |
|---|------------------------------|--------|
| 1 | (occupation* or worker*).af. | 598708 |
| 2 | exp occupational disease/    | 132609 |
| 3 | exp occupational exposure/   | 66023  |
| 4 | exp occupational medicine/   | 61100  |
| 5 | occupational risk.mp.        | 2529   |

|    |                                                            |         |
|----|------------------------------------------------------------|---------|
| 6  | exp occupational hazard/                                   | 14479   |
| 7  | industry mortality.mp.                                     | 13      |
| 8  | occupational group*.mp.                                    | 3053    |
| 9  | 'work-related'.mp.                                         | 11855   |
| 10 | occupational air pollutants.mp.                            | 18      |
| 11 | working environment.mp.                                    | 3371    |
| 12 | 2 or 3 or 4 or 5 or 6 or 7 or 8 or 9 or 10 or 11           | 255072  |
| 13 | 1 or 12                                                    | 663920  |
| 14 | physical load.mp.                                          | 1252    |
| 15 | repetiti*.mp.                                              | 94303   |
| 16 | force.mp.                                                  | 191343  |
| 17 | exp exposure/                                              | 432491  |
| 18 | hand-arm vibration.mp.                                     | 744     |
| 19 | risk factor*.mp.                                           | 812959  |
| 20 | 14 or 15 or 16 or 17 or 18 or 19                           | 1489407 |
| 21 | exp carpal tunnel syndrome/ep, et [Epidemiology, Etiology] | 1935    |
| 22 | median nerve neuropathy.mp.                                | 33      |
| 23 | median nerve entrapment.mp.                                | 147     |
| 24 | median nerve compression.mp.                               | 483     |
| 25 | nerve compression syndrome.mp.                             | 215     |
| 26 | 21 or 22 or 23 or 24 or 25                                 | 2696    |
| 27 | review.ab.                                                 | 919916  |
| 28 | review.pt.                                                 | 2058456 |
| 29 | meta-analysis as topic/                                    | 11639   |
| 30 | meta-analysis.ab.                                          | 54831   |
| 31 | meta-analysis.pt.                                          | 0       |
| 32 | meta-analysis.ti.                                          | 38008   |
| 33 | 27 or 28 or 29 or 30 or 31 or 32                           | 2542083 |
| 34 | letter.pt.                                                 | 859394  |
| 35 | editorial.pt.                                              | 459424  |
| 36 | comment.pt.                                                | 0       |
| 37 | 34 or 35 or 36                                             | 1318818 |
| 38 | 33 not 37                                                  | 2537782 |
| 39 | 13 or 20                                                   | 2014011 |
| 40 | 26 and 39                                                  | 2309    |
| 41 | 38 and 40                                                  | 426     |
| 42 | limit 41 to human                                          | 410     |

|    |                                |     |
|----|--------------------------------|-----|
| 43 | limit 42 to yr="1998 -Current" | 262 |
| 44 | limit 43 to abstracts          | 228 |

3  
4  
5

**Table 3 – Literature search in CINAHL via EBSCO (Update 27.7.14)**

| #   | Search terms                                                      | hits   |
|-----|-------------------------------------------------------------------|--------|
| S1  | TX occupation* or worker*                                         | 164434 |
| S2  | MH occupational disease                                           | 5650   |
| S3  | MH occupational exposure                                          | 10145  |
| S4  | MH occupational medicine                                          | 87     |
| S5  | TX occupational risk*                                             | 2260   |
| S6  | TX occupational hazard*                                           | 3844   |
| S7  | MH industry                                                       | 7372   |
| S8  | MJ mortality                                                      | 30081  |
| S9  | TX occupational group*                                            | 1272   |
| S10 | TX work-related                                                   | 3941   |
| S11 | TX occupational air pollutants                                    | 527    |
| S12 | TX working environment.mp.                                        | 1336   |
| S13 | S2 or S3 or S4 or S5 or S6 or S7 or S8 or S9 or S10 or S11 or S12 | 59958  |
| S14 | S1 or S13                                                         | 200548 |
| S15 | TX exposure                                                       | 49901  |
| S16 | TX physical load                                                  | 193    |
| S17 | TX risk factor*                                                   | 173132 |
| S18 | TX repetiti*                                                      | 7936   |
| S19 | TX hand-arm vibration*                                            | 32     |
| S20 | TX force                                                          | 21394  |
| S21 | S15 or S16 or S17 or S18 or S19 or S 20                           | 239804 |
| S22 | S14 or S21                                                        | 408060 |
| S23 | MH carpal tunnel syndrome                                         | 1556   |
| S24 | TX carpal tunnel syndrome                                         | 1862   |
| S25 | TX median nerve neuropathy                                        | 19     |
| S26 | TX median nerve entrapment                                        | 30     |
| S27 | TX nerve compression syndrome                                     | 51     |
| S28 | S23 or S24 or S25 or S26 or S27                                   | 1908   |
| S29 | S22 and S28                                                       | 695    |
| S30 | PT meta-analysis                                                  | 0      |
| S31 | TI meta-analysis                                                  | 7191   |

|     |                                                                                  |        |
|-----|----------------------------------------------------------------------------------|--------|
| S32 | PT review*                                                                       | 92884  |
| S33 | TI review*                                                                       | 77846  |
| S34 | S30 or S31 or S32 or S33                                                         | 165513 |
| S35 | S29 and S34                                                                      | 63     |
| S36 | S29 and S35 Limiters - Abstract Available; Published Date: 19980101-<br>20141231 | 45     |

---
