# Supplementary material for: Association between work-related biomechanical risk factors and the occurrence of carpal tunnel syndrome: an overview of systematic reviews and a meta-analysis of current research
Source: Springer Nature journal article supplement (doi:10.1186/s12891-015-0685-0), 2015-08-31
Supplement: MOESM1 [file 9752588]

**Additional file 1 – A proposed reporting checklist for authors, editors and reviewers of meta-analyses of observational studies in epidemiology (MOOSE)<sup>a</sup>**

| Checklist                                                                                                                                                                                                                                                                        | Yes/no/<br>n.a.  |
|----------------------------------------------------------------------------------------------------------------------------------------------------------------------------------------------------------------------------------------------------------------------------------|------------------|
| <b>Reporting of background</b>                                                                                                                                                                                                                                                   |                  |
| 1. Problem definition                                                                                                                                                                                                                                                            | yes              |
| 2. Hypothesis statement                                                                                                                                                                                                                                                          | yes              |
| 3. Description of study outcome                                                                                                                                                                                                                                                  | yes              |
| 4. Type of exposure or intervention used                                                                                                                                                                                                                                         | yes              |
| 5. Type of study design used                                                                                                                                                                                                                                                     | yes              |
| 6. Study population                                                                                                                                                                                                                                                              | yes              |
| <b>Reporting of search strategy should include</b>                                                                                                                                                                                                                               |                  |
| 7. Qualification of searchers (e.g. librarians)                                                                                                                                                                                                                                  | yes <sup>1</sup> |
| 8. Search strategy, including time period included in the synthesis and keywords                                                                                                                                                                                                 | yes              |
| 9. Effort to include all available studies, including contact with authors                                                                                                                                                                                                       | yes              |
| 10. Databases and registries searched                                                                                                                                                                                                                                            | yes              |
| 11. Search software used, name, version, including special features used (e.g. explosion)                                                                                                                                                                                        | yes <sup>2</sup> |
| 12. Use of hand searching (e.g. reference lists of obtained studies)                                                                                                                                                                                                             | yes              |
| 13. List of citations located and those excluded, including justification                                                                                                                                                                                                        | yes              |
| 14. Method of addressing articles published in languages other than English                                                                                                                                                                                                      | yes              |
| 15. Methods of handling abstracts and unpublished studies                                                                                                                                                                                                                        | no <sup>3</sup>  |
| 16. Description of any contact with authors                                                                                                                                                                                                                                      | no <sup>4</sup>  |
| <b>Reporting of methods should include</b>                                                                                                                                                                                                                                       |                  |
| 17. Description of relevance or appropriateness of studies assembled for assessing the hypothesis to be tested                                                                                                                                                                   | yes              |
| 18. Rationale for the selection and coding of data                                                                                                                                                                                                                               | yes              |
| 19. Documentation of how data were classified and coded (e.g. multiple raters, blinding and interrater reliability)                                                                                                                                                              | yes              |
| 20. Assessment of confounding (e.g. comparability of cases and controls in studies where appropriate)                                                                                                                                                                            | n.a.             |
| 21. Assessment of study quality, including blinding of quality assessors, stratification or regression possible predictors of study results                                                                                                                                      | yes              |
| 22. Assessment of heterogeneity                                                                                                                                                                                                                                                  | yes              |
| 23. Description of statistical methods (e.g. complete description of fixed or random effect models, justification of whether the chosen models account for predictors of study results, dose-response models, or cumulative meta-analysis) in sufficient detail to be replicated | yes              |

|                                                                                                                                |                   |
|--------------------------------------------------------------------------------------------------------------------------------|-------------------|
| 24. Provision of appropriate tables and graphics                                                                               | yes               |
| <b>Reporting of results should include</b>                                                                                     |                   |
| 25. Graphic summarising individual study estimates and overall estimate                                                        | yes               |
| 26. Table giving descriptive information for each study included                                                               | yes               |
| 27. Results of sensitivity testing (e.g. subgroup analysis)                                                                    | n.a.              |
| 28. Indication of statistical uncertainty of findings                                                                          | n.a.              |
| <b>Reporting of discussion should include</b>                                                                                  |                   |
| 29. Quantitative assessment of bias (e.g. publication bias)                                                                    | n.a. <sup>5</sup> |
| 30. Justification for exclusion (e.g. exclusion of non-English-language citations)                                             | yes               |
| 31. Assessment of quality of the included studies                                                                              | yes               |
| <b>Reporting of conclusions should include</b>                                                                                 |                   |
| 32. Consideration of alternative explanations for the observed results                                                         | yes               |
| 33. Generalization of the conclusions (i.e. appropriate for the data presented and within the domain of the literature review) | yes               |
| 34. Guidelines for future research                                                                                             | yes               |
| 35. Disclosure of funding source                                                                                               | yes               |

---

*Note.* Supplementary materials such as the data extraction form of each systematic review and primary study are available on request. A list of citations located and those excluded, including justification is also available on request.

<sup>a</sup>Stroup DF, Berlin JA, Morton SC, Olkin I, Williamson GD, Rennie D, Moher D, Becker BJ, Sipe TA, Thacker SB: Meta-analysis of observational studies in epidemiology: a proposal for reporting. Meta-analysis Of Observational Studies in Epidemiology (MOOSE) group. JAMA 2000, 283: 2008-2012.

<sup>1</sup>The literature search was compiled and adapted for the three databases MEDLINE, EMBASE and CINAHL with the assistance of an experienced librarian and colleagues with a broad experience in the conduction of systematic reviews.

<sup>2</sup>The results of the literature search were imported and checked for duplicates using the reference management software Mendeley (Version 1.13.0.0).

<sup>3</sup>We did not attempt to identify unpublished data.

<sup>4</sup>Authors were not contacted, as adequate information for the performance of this review was available from publications.

<sup>5</sup>A test for publication bias was not conducted as it may not be accurate for small sample sizes, i.e. small number of studies in the meta-analysis.

*Abbreviations.* n.a., not applicable; detailed information not provided in the main manuscript.
