# Supplementary material for: Association between work-related biomechanical risk factors and the occurrence of carpal tunnel syndrome: an overview of systematic reviews and a meta-analysis of current research
Source: Springer Nature journal article supplement (doi:10.1186/s12891-015-0685-0), 2015-08-31
Supplement: MOESM5 [file 9752588]

## Additional file 5 – Appraisal of systematic reviews using AMSTAR-R tool

| AMSTAR-R Item                    | 1  |    | 2  |    | 3  |    | 4  |    | 5  |    | 6  |    | 7  |    | 8  |    | 9  |    | 10 |    | 11 |    | Final Score | $\kappa$ |
|----------------------------------|----|----|----|----|----|----|----|----|----|----|----|----|----|----|----|----|----|----|----|----|----|----|-------------|----------|
| Rater (AK/ TW)                   | AK | TW | AK | TW | AK | TW | AK | TW | AK | TW | AK | TW | AK | TW | AK | TW | AK | TW | AK | TW | AK | TW |             |          |
| You et al. 2014 [43]             | 3  | 3  | 1  | 1  | 3  | 3  | 2  | 2  | 1  | 1  | 4  | 4  | 2  | 1  | 2  | 1  | 4  | 4  | 4  | 4  | 2  | 2  | 28          | 0.76     |
| Mediouni et al. 2014 [42]        | 3  | 3  | 2  | 2  | 4  | 4  | 3  | 4  | 4  | 4  | 4  | 4  | 1  | 1  | 1  | 1  | 4  | 4  | 3  | 3  | 2  | 2  | 32          | 0.87     |
| Barcenilla et al. 2012 [41]      | 3  | 3  | 4  | 4  | 4  | 4  | 2  | 2  | 2  | 2  | 4  | 4  | 3  | 4  | 4  | 3  | 4  | 4  | 4  | 4  | 2  | 2  | 36          | 0.69     |
| Spahn et al. 2012 [31]           | 3  | 3  | 2  | 2  | 4  | 4  | 4  | 4  | 1  | 1  | 3  | 4  | 1  | 1  | 1  | 1  | 3  | 4  | 3  | 3  | 2  | 2  | 27          | 0.76     |
| Van Rijn et al. 2009 [35]        | 3  | 3  | 4  | 4  | 3  | 3  | 4  | 4  | 1  | 1  | 4  | 4  | 3  | 4  | 3  | 2  | 1  | 1  | 1  | 1  | 2  | 2  | 29          | 0.76     |
| Lozano-Calderón et al. 2008 [46] | 2  | 3  | 2  | 2  | 2  | 1  | 2  | 2  | 1  | 1  | 2  | 2  | 3  | 2  | 3  | 2  | 1  | 1  | 1  | 1  | 2  | 2  | 19          | 0.38     |
| Thomsen et al. 2008 [45]         | 3  | 3  | 1  | 1  | 4  | 4  | 2  | 2  | 1  | 1  | 4  | 4  | 3  | 2  | 3  | 2  | 1  | 1  | 1  | 1  | 3  | 3  | 26          | 0.76     |
| Palmer et al. 2007 [22]          | 3  | 2  | 4  | 4  | 4  | 4  | 2  | 2  | 1  | 1  | 4  | 4  | 1  | 1  | 1  | 1  | 1  | 1  | 1  | 1  | 3  | 3  | 24          | 0.87     |
| Sulsky et al. 2005 [44]          | 3  | 3  | 4  | 4  | 1  | 1  | 3  | 4  | 1  | 1  | 4  | 4  | 3  | 4  | 4  | 2  | 1  | 1  | 1  | 1  | 2  | 1  | 27          | 0.48     |
| Abbas et al. 1998 [21]           | 2  | 2  | 1  | 1  | 1  | 1  | 2  | 2  | 1  | 1  | 4  | 4  | 1  | 1  | 1  | 1  | 2  | 1  | 3  | 3  | 2  | 2  | 20          | 0.86     |
| Number of mismatch per item      | 2  |    | 0  |    | 1  |    | 2  |    | 0  |    | 1  |    | 6  |    | 6  |    | 2  |    | 0  |    | 1  |    |             |          |

Note. Number in brackets after consensus agreement. Numeric AMSTAR-R quality score in grades: A=37-44; B=29-36; C=21-28; D=13-20 points.

Abbreviations:  $\kappa$  Cohen's Kappa Coefficient.
